# Supplementary material
Source: PubMed Central journal article supplement (PMC3682217)

Reynoso et al.  
Supplemental Figure 1

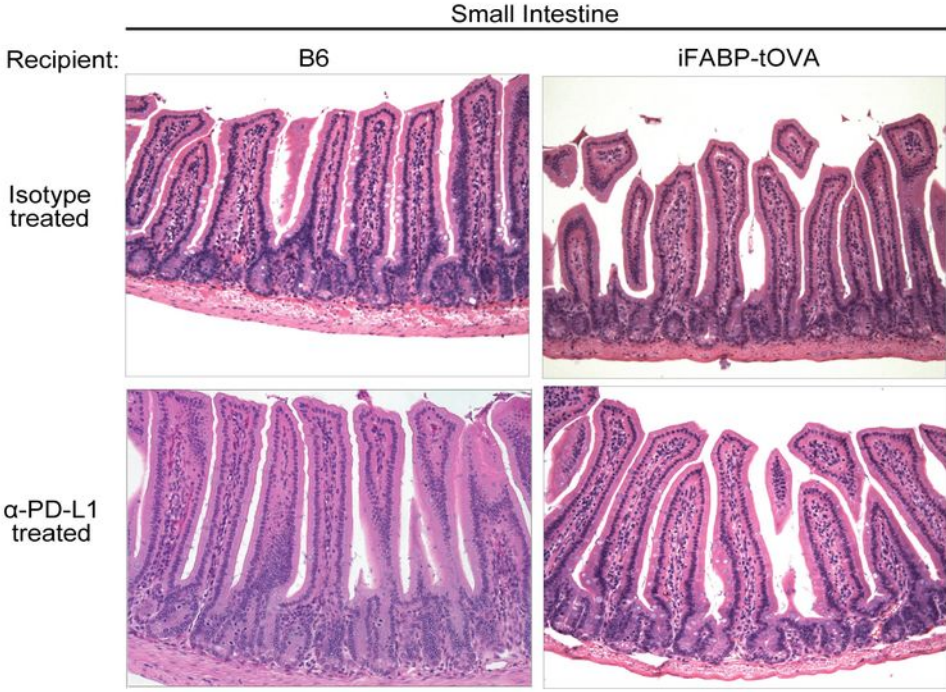

Supplement: NIHMS83466-supplement-2.pdf [file NIHMS83466-supplement-2.pdf]

Reynoso et al.  
Supplemental Figure 2

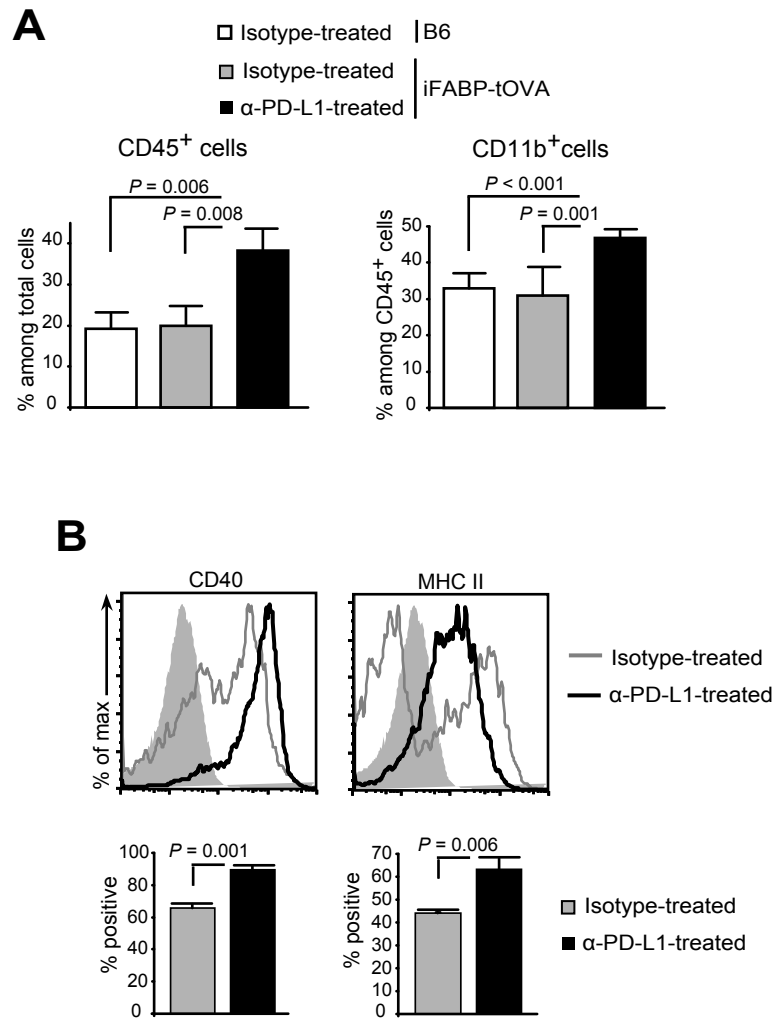

Supplement: NIHMS83466-supplement-3.pdf [file NIHMS83466-supplement-3.pdf]

Reynoso et al.  
Supplemental Figure 3

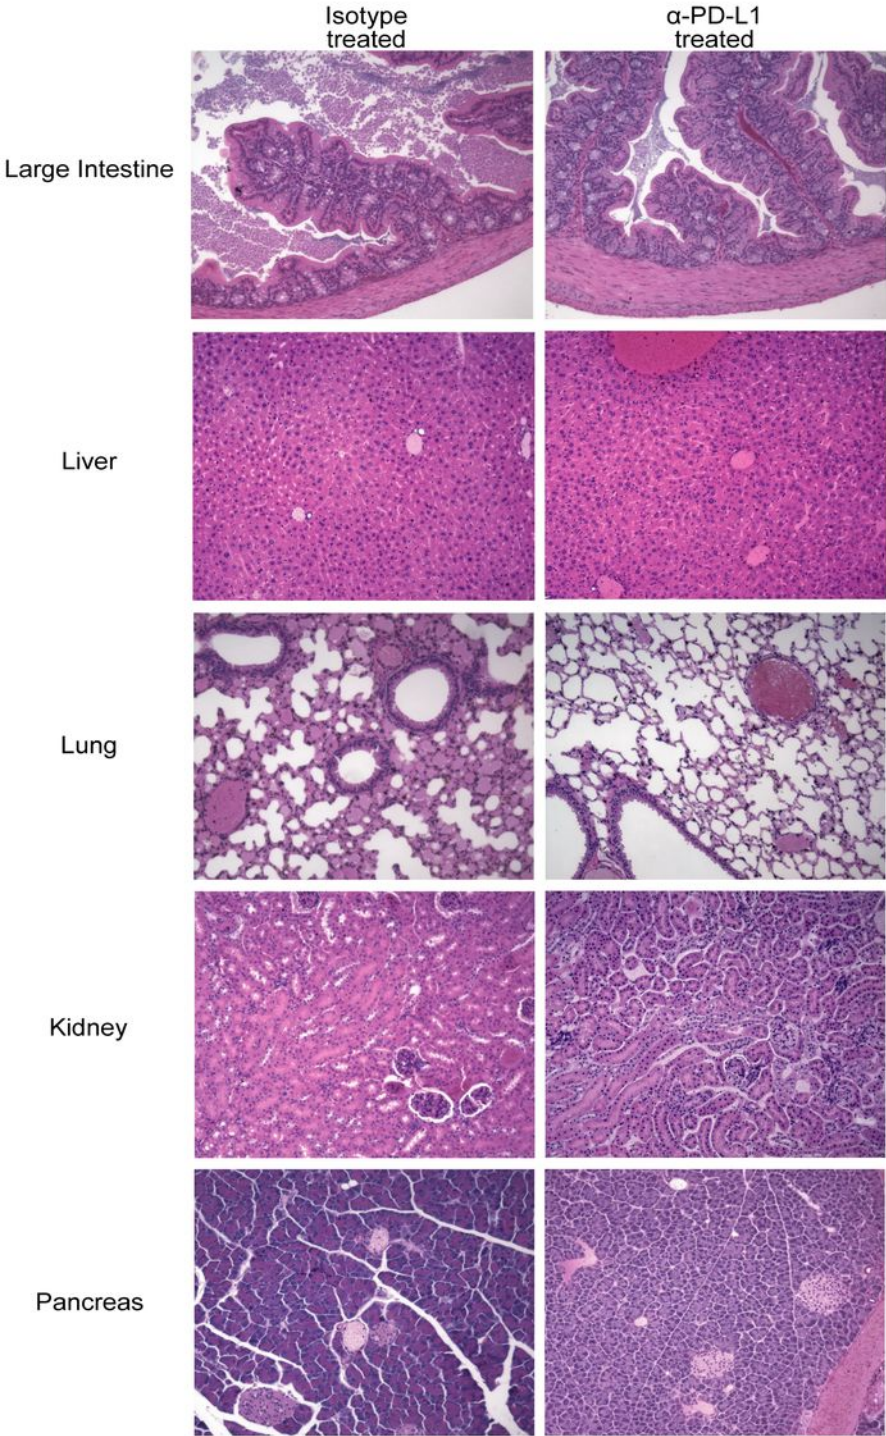

Supplement: NIHMS83466-supplement-4.pdf [file NIHMS83466-supplement-4.pdf]
